# Supplementary material for: Evaluating seasonal variation in trace element content of savory
Source: Research Square preprint supplement (doi:10.21203/rs.3.rs-1623303/v1), 2022-05-09
Supplement: Supplementary file 1 [file 48a9a6776c7965f405eb0eee.docx]

Table S1 The accuracy and precision of the method using Certified Reference Material (CRM LGC7162).

| Element | Certified value  (mg/kg) | Found value  (mg/kg) | Accuracy  (%) | Precision  (%) |
| --- | --- | --- | --- | --- |
| Cr | 2.15 ± 0.34 | 2.23 ± 0.04 | 106.2 | 1.8 |
| Mn | 171 ± 10 | 160.0 ± 4 | 93.6 | 2.5 |
| Ni | 2.6 ± 0.7 | 2.57 ± 0.03 | 98.9 | 1.2 |
| Zn | 24± 5 | 23.4 ± 0.1 | 97.5 | 0.4 |

Table S2Basic characteristics of the locality Kravlje village

| Ha (m) | Nb | E | Substrate | Climate |
| --- | --- | --- | --- | --- |
| 332 | 43° 27′ 16″ | 21° 54′ 20″ | quartz | temperate continental |

a Altitude; b Latitude; c Longitude

Table S3 ICP-OES parameters: wavelengths (λ) of the analytical lines, coefficient correlation (r), linearity of the calibration curves, the limit of detection and quantification (LOD and LOQ) of the calibration curve for each element

| Element | λ (nm) - Plant | λ (nm) - Soil | r | LOD (mg/kg) | LOQ (mg/kg) |
| --- | --- | --- | --- | --- | --- |
| B | 208.959 | 208.959 | 1.0000 | 0.0165 | 0.0548 |
| Si | 251.611 | 251.611 | 0.9998 | 0.0408 | 0.1360 |
| Cr | 357.869 | 357.869 | 0.9999 | 0.0476 | 0.1587 |
| Mn | 257.610 | 257.610 | 0.9999 | 0.1255 | 0.4182 |
| Ni | 341.476 | 231.604 | 1.00000 | 0.1594 | 0.5313 |
| Cu | 327.396 | 327.396 | 0.99997 | 0.0190 | 0.0632 |
| Zn | 213.856 | 213.856 | 0.99984 | 0.0031 | 0.0104 |
